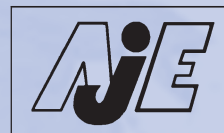

Supplement to:

# American Journal of Epidemiology

Volume 167 Number 11 June 1, 2008

[www.aje.oxfordjournals.org](http://www.aje.oxfordjournals.org)

## Abstracts of the 41st Annual Meeting

Society for Epidemiologic Research

Chicago, Illinois, June 24–27, 2008

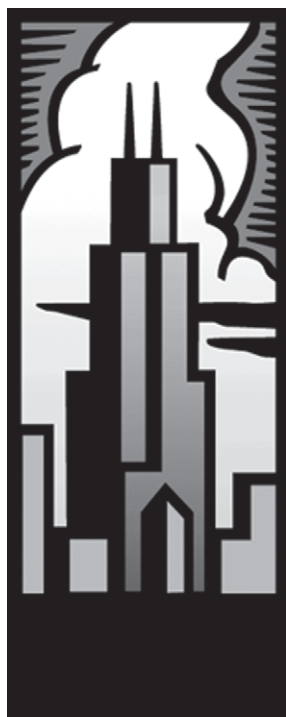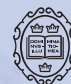

---

# ABSTRACTS

---

## of the Society for Epidemiologic Research<sup>1</sup>

---

### OFFICERS

|                                            |                                                                                                                                                         |
|--------------------------------------------|---------------------------------------------------------------------------------------------------------------------------------------------------------|
| President.....                             | Sherman James                                                                                                                                           |
| President-Elect .....                      | Malcolm Maclure                                                                                                                                         |
| Past-President .....                       | Michael Bracken                                                                                                                                         |
| Secretary-Treasurer .....                  | Joseph L. Lyon                                                                                                                                          |
| Committee Members .....                    | Mary Haan (Term Expires in 2008)<br>Noel Weiss (Term Expires in 2008)<br>Sandro Galea (Term Expires in 2009)<br>Leslie Bernstein (Term Expires in 2010) |
| President – SER Student Caucus .....       | Danielle Iuliano                                                                                                                                        |
| President – Elect SER Student Caucus ..... | Vanessa Moore                                                                                                                                           |
| Past-President – SER Student Caucus .....  | Sara Ellis Simonsen                                                                                                                                     |

---

<sup>1</sup> This is the thirty sixth year of publications of these proceedings. The *American Journal of Epidemiology* has published the Proceedings every year since 1974. The abstracts of the papers presented at the Sixth Annual Meeting (1973) were published under the sponsorship of National Health and Welfare Canada.
